1 **Parallel clines in a quantitative trait in butterfly co-mimics despite different levels of genomic**  
2 **divergence and selection**

3 Emma V. Curran<sup>1\*</sup>, Sean Stankowski<sup>1</sup>, Carolina Pardo-Diaz<sup>2</sup>, Camilo Salazar<sup>2</sup>, Mauricio Linares<sup>2</sup>,  
4 Nicola J. Nadeau<sup>1, 3\*</sup>

5 <sup>1</sup>Department of Animal and Plant Sciences, University of Sheffield, UK;

6 <sup>2</sup>Biology Program, Faculty of Natural Sciences and Mathematics, Universidad del Rosario, Bogota,  
7 Colombia;

8 <sup>3</sup>The Smithsonian Tropical Research Institute, Panama City, Republic of Panama

9 \*Corresponding authors: [e.v.curran@sheffield.ac.uk](mailto:e.v.curran@sheffield.ac.uk), [n.nadeau@sheffield.ac.uk](mailto:n.nadeau@sheffield.ac.uk)

10

11

12 Running title: Parallel divergence in a quantitative trait

13 Abstract word count: 225

14 Total word count: 7998

15

16 **Abstract**

17 Hybrid zones, where phenotypically distinct populations meet and interbreed, give insight into how  
18 differences between populations are maintained despite gene flow. Divergence in quantitative traits,  
19 controlled by multiple loci, may require stronger barriers to gene flow than traits controlled by few,  
20 major effect loci. The butterflies *Heliconius erato* and *Heliconius melpomene* are distantly related  
21 Müllerian mimics that show parallel divergence in wing colour patterns between geographical races  
22 across South America. We investigated intraspecific hybrid zones in which the colour patterns of both  
23 species show discrete variation in pigmentation, and quantitative variation in iridescent blue. We  
24 tested whether differentiation across hybrid zones persisted due to genome-wide barriers to gene flow  
25 maintained by indirect selection, or whether it resulted from direct selection on colour patterns in the  
26 face of gene flow. Analysis of phenotypic clines revealed parallel clines in iridescence between  
27 species, consistent with direct selection for mimicry, but cline widths were different between species,  
28 indicating differences in the strength of selection on iridescence. Genotyping-by-sequencing revealed  
29 less defined population structure and weaker genomic differentiation in *H. melpomene*, suggesting the  
30 hybrid zone has evolved differently in the two species. In both species, iridescence clines were not  
31 concordant with genome-wide ancestry clines, suggesting that they are targets of direct selection. This  
32 is the first direct comparison of divergence in quantitative and Mendelian traits in this classic  
33 Müllerian mimicry system.

34

35 **Key words:** Hybrid zones, quantitative trait variation, gene flow, selection, cline analysis, Müllerian  
36 mimicry

37

38

39

## 40 **Introduction**

41 Hybrid zones, where genetically differentiated populations are in contact and interbreed, have long  
42 been a valuable resource in understanding the evolutionary processes shaping taxonomic boundaries.  
43 Hybrid zones can form in continuously distributed populations, where different alleles are favoured at  
44 either end of an ecological gradient or transition, a process called primary intergradation.  
45 Alternatively, they can form when previously isolated populations, which have become genetically  
46 differentiated in allopatry, come into secondary contact (Endler, 1977). Both scenarios can result in  
47 clinal variation in quantitative traits and allele frequencies across the hybrid zone, where such clines  
48 are maintained by the balance between gene flow following dispersal, and selection (Barton & Hewitt,  
49 1985).

50 Total selection acting on a divergent locus is composed of direct selection on that locus, plus  
51 the indirect selection it experiences from other loci also under divergent selection, depending on the  
52 strength of linkage disequilibrium (LD) between it and those other diverged loci (Barton, 1983; Barton  
53 & Gale, 1993). When the strength of direct selection outweighs indirect selection, the width of a cline  
54 informs about the strength of selection acting on that trait or genetic locus, with cline width being  
55 proportional to the strength of selection for a given dispersal parameter (Barton & Hewitt, 1985).  
56 Under this scenario the cline centre indicates the point at which the direction of divergent selection  
57 changes, so cline coincidence can indicate a common selective agent (Barton & Hewitt, 1985). The  
58 shape and position of clines can also be determined by the number of loci involved and the strength of  
59 LD between them. If the strength of direct selection on each locus is outweighed by indirect selection  
60 from many loci in LD, the total selection affecting such loci will be approximately equal, resulting in  
61 them having similar centres and widths, and being steeper at the centre (or “stepped”) where LD is  
62 strongest (Kruuk, Baird, Gale, & Barton, 1999; Szymura & Barton, 1991).

63 Differentiation in phenotypes showing discrete variation across hybrid zones can be maintained by  
64 strong divergent selection, despite high levels of gene flow across the rest of the genome (Gompert,  
65 Mandeville, & Buerkle, 2017). This has been demonstrated in crows (Poelstra et al., 2014), warblers

66 (Toews et al., 2016), and monkeyflowers (Stankowski, Sobel, & Streisfeld, 2015). In contrast, studies  
67 which examine clines in quantitative traits under divergent selection across hybrid zones, often find that  
68 they are accompanied by stepped clines in genetic markers, indicating indirect selection on many  
69 different loci across the genome and genetic structure across the hybrid zone, despite some gene flow  
70 [e.g. *Larus* gulls (Gay, Crochet, Bell, & Lenormand, 2008) and *Bombina* toads (Szymura & Barton,  
71 1986)], although divergent selection can also maintain differentiation in quantitative traits across hybrid  
72 zones without population structure [e.g. floral traits in *Ipomopsis* (Milano, Kenney, & Juenger, 2016)].  
73 Quantitative traits tend to have a more complex, polygenic genetic basis [e.g. human height (Allen et  
74 al., 2010)]. Polygenic local adaptation may only require small allele frequency changes, but can also  
75 involve greater levels of covariance between loci (Le Corre & Kremer, 2012). The combined action of  
76 divergent selection and the build-up of statistical associations between loci can reduce effective  
77 migration rates across the genome (Flaxman, Wacholder, Feder, & Nosil, 2014; Kruuk et al., 1999).  
78 Therefore, an increased level of overall genome-wide differentiation, and population level genetic  
79 structure may be expected across hybrid zones over which quantitative variation is maintained.

80 Here, we studied the clinal variation of two colour pattern traits in South and Central American  
81 *Heliconius* butterflies: the yellow hindwing bar (Mendelian) and iridescence (quantitative). *Heliconius*  
82 *erato* and *Heliconius melpomene* are Müllerian co-mimics with bright aposematic wing colour  
83 patterns. Where they co-occur, they converge on almost identical wing colour patterns to share the  
84 cost of educating predators of their distastefulness (Brown, 1981). Both species comprise many  
85 parapatric colour pattern races, or subspecies, connected by hybrid zones (Mallet, 1993; Rosser,  
86 Dasmahapatra, & Mallet, 2014). When members of different subspecies hybridise, their offspring can  
87 display novel or heterozygous phenotypes (Arias et al., 2008; Mallet, 1989; Mallet, 1986). Predators  
88 are less likely to learn to avoid rare phenotypes, causing frequency-dependent selection on colour  
89 patterns (Langham, 2004; Mallet & Barton, 1989). This maintains stable hybrid zones (Mallet, 1986;  
90 Rosser et al., 2014). The diverse colouration seen in the *Heliconius* genus has been extensively  
91 studied, the vast majority of which is determined by a genetic ‘tool kit’ of around five major-effect

92 loci (Baxter, Johnston, & Jiggins, 2009; Kronforst et al., 2006; Martin et al., 2012; Nadeau, 2016;  
93 Nadeau et al., 2016; Reed et al., 2011; Westerman et al., 2018). Previous studies have found low levels  
94 of genetic differentiation between parapatric colour races, with a few diverged loci which mainly  
95 control colour pattern differences (Martin et al., 2013; Nadeau et al., 2014, 2012; Supple et al., 2013).

96 Near the Panamanian-Colombian border, there are co-occurring hybrid zones between subspecies  
97 of *H. erato* and *H. melpomene*, which differ in the presence of a yellow hindwing bar and in iridescent  
98 blue colouration (Mallet, 1986; Figure 1). The iridescence is produced by nano-structural ridges on the  
99 surface of wing scales, which are layered to produce constructive interference of blue light (Parnell et  
100 al., 2018). In a system so well-studied, little is known about how selection acts on structural colour  
101 (Sweeney, Jiggins, & Johnsen, 2003) and divergence in this trait as not been previously studied. While  
102 the yellow bar is controlled by a single major-effect gene (Mallet, 1986; Nadeau, 2016), iridescence  
103 segregates as continuous variation, with conservative estimates suggesting it is controlled by around  
104 five additive genetic loci (Brien et al., 2018).

105 Here, we use geographic cline analysis to test whether the colour pattern clines are maintained by  
106 direct or indirect selection, and what we can learn about the selection regimes impacting variation and  
107 convergence of iridescence. By obtaining genome-wide SNP data we can question the extent to which  
108 genome-wide barriers to gene flow may maintain the iridescence clines via indirect selection, or  
109 whether differentiation is maintained by direct selection in the face of gene flow, as is seen in other  
110 instances of colour pattern divergence in these species (Nadeau et al., 2014). This is also an  
111 opportunity to examine how the different genetic architectures of the traits influences the properties of  
112 the clines.

113

114

115

116 **Methods**

117 *Butterfly specimens*

118 Wild *Heliconius melpomene* and *Heliconius erato* individuals were collected from several sites in the  
119 Chocó rainforest corridor between the Andes and the Pacific in Ecuador and Colombia, and part way  
120 across the isthmus of Panama (Figure 1, SI Table S1). Wings were removed and stored inside  
121 envelopes. Bodies were preserved in NaCl saturated 20% dimethyl sulfoxide (DMSO) 0.25M EDTA.

122

123 *Phenotypic measurements*

124 Digital images of butterfly wings were taken with a Nikon D7000 DSLR camera fitted with an AF-S  
125 DX Micro NIKKOR 40 mm f/2.8G lens (Nikon UK Ltd., Surrey, UK), mounted on an adjustable  
126 platform. Standardised lighting conditions were achieved using two external natural daylight  
127 fluorescent lights, mounted to illuminate at 45 degrees from incident, to maximise brightness of  
128 observed iridescent colour. Photographs were taken with a shutter speed of 1/60 sec and an aperture of  
129 f/10. Each sample was photographed with an X-Rite colorchecker passport (X-Rite, Inc., MI, USA) in  
130 shot. The Nikon raw (.NEF) image files were converted to standard raw files (.DNG) using Adobe  
131 DNG converter (Adobe Systems Inc., USA). The RGB channels in the images were then linearized  
132 using the neutral grey scale on the colorchecker using GNU Image Manipulation Program, v2.8.

133 The mean RGB values from regions in the discal cell on the right forewing and the Cu<sub>2</sub> cell on  
134 the right hindwing were measured (SI Figure S1). If the wings on the right-hand side showed damage,  
135 wings on the left-hand side were used. Wing regions were selected using the polygon selection tool in  
136 ImageJ, version 1.50b (Abràmoff, Magalhães, & Ram, 2004), and mean RGB scores were measured  
137 using the Color Histogram plugin. To minimise variation in blue colour due to age and wing wear, we  
138 excluded individuals with extensive wing wear or damage.

139 We tested for repeatability (Whitlock & Schluter, 2009) of the RGB values on 26 individuals  
140 photographed a second time under the same conditions on a different day, with a second set of RGB

141 measurements taken. These individuals were selected from regions in which varying levels of  
142 iridescence is seen (20 individuals from Valle del Cauca, Colombia, and 6 individuals from Darién,  
143 Panama). Variance among individuals was calculated by taking the difference between the group mean  
144 square and the error mean square, and dividing it by the number of replicates. These components of  
145 variance were extracted from a general linear model in R v3.2.3 (R Core Team, 2015). The fraction of  
146 total variance that is due to true differences between individuals was then calculated by dividing the  
147 variance among individuals by the total variance.

148 A measure of relative blue reflectance (blue score) was determined for each individual by  
149 taking the mean blue channel value (B) and the mean red channel value (R) for both wing regions and  
150 calculating:

$$151 \quad BR = (B-R)/(B+R)$$

152 This gives a standardised score of how blue an individual is, with  $BR = 1$  being the ‘bluest’,  
153 and  $BR = -1$  being the ‘reddest’.

154

#### 155 *Estimation of ‘yellow bar’ allele frequencies*

156 Allele frequencies for the yellow hindwing bar were estimated based on phenotype for both species.  
157 This was done for all sampling sites in Colombia and Panama with five or more individuals. The  
158 ‘yellow bar’ phenotype was scored categorically according to Mallet (1986), who showed that this  
159 phenotype segregates in the same way for both *Heliconius erato* and *H. melpomene*. Variation in the  
160 yellow bar across this hybrid zone is controlled by three alleles: The North Colombian yellow bar  
161 allele (Y), the West Colombian yellow bar allele ( $y_{wc}$ ) and the Central American yellow bar allele ( $y_{ca}$ ).  
162 Individuals of both species with a yellow bar on both sides of the wing (Figure 1A) have genotype  
163  $y_{ca}y_{ca}$ . Individuals lacking a yellow bar (Figure 1B) have genotype YY. Individuals with the “shadow  
164 bar” phenotype, where the outline of the bar can be seen on the underside of the hindwing without any  
165 yellow pigment, and without a bar on the upper side of the hindwing, have genotype  $Yy_{wc}$  or  $Yy_{ca}$ .

166 Individuals with a yellow bar on the underside of the hindwing (Figure 1C) have genotype  $y_{wc}y_{ca}$  or  
167  $y_{wc}y_{wc}$ . As two of the four phenotypes can be produced by two different allele combinations we  
168 inferred the allele frequencies at each locality for each species assuming Hardy-Weinberg equilibrium  
169 for the three alleles. The frequency of Y could be directly observed from both its heterozygous and  
170 homozygous phenotypes. The frequency of  $y_{ca}$  could be inferred from the frequency of its  
171 homozygous phenotype, allowing us to infer the frequency of  $y_{wc}$ .

172

### 173 *Phenotypic cline analysis*

174 We modelled changes in frequency of the West Colombian yellow bar allele ( $y_{wc}$ ) and level of  
175 iridescence (BR) in *Heliconius erato* and *Heliconius melpomene* along the transect by fitting a number  
176 of geographic cline models (Szymura & Barton, 1991; Szymura & Barton, 1986) implemented using  
177 the software ANALYSE v1.30 (Barton & Baird, 2002). Sampling sites with fewer than five  
178 individuals were excluded, leaving 529 *H. erato* and 126 *H. melpomene*. Blue scores were rescaled  
179 between 0 and 1 by dividing the difference between the individual's blue score ( $BR_i$ ) and the species  
180 minimum, by the blue score range for the species:

$$181 \quad BR_{\text{norm}} = (BR_i - BR_{\text{min}})/(BR_{\text{max}} - BR_{\text{min}})$$

182 Distances between sampling sites were estimated using the great circle distance, which is the  
183 shortest distance between two points on the surface of a sphere. This was calculated using the  
184 'hzar.map.greatCircleDistance' function in the R package HZAR (Derryberry, Derryberry, Maley, &  
185 Brumfield, 2013).

186 ANALYSE fits cline models to marker loci and/or quantitative trait data, and can be used to  
187 compare the fit of three alternative cline models. The simplest model is a sigmoid cline described by a  
188 four-parameter hyperbolic tangent,

$$189 \quad p(z) = (1 + \tanh[2(x_i - c)/w])/2$$



190 Where  $p(z)$  is a gene frequency (or mean score of a trait) at position  $x$ ,  $c$  is the cline centre and  $w$  is the  
191 cline width, defined as the ratio between the total change in the frequency of an allele ( $\Delta p$ ) or value of  
192 the trait ( $\Delta z$ ) across the cline and gradient at the cline centre:

$$193 \quad \Delta p(z) / (\partial z / \partial x)$$

194 The other two more complex models are ‘stepped’ clines. They consist of a central sigmoid step  
195 flanked by two exponential tails:

$$196 \quad z = \alpha \exp(-4x\sqrt{\theta/w})$$

197 The tails describe the pattern of introgression from the centre into the foreign genepool;  $\theta$  is the rate of  
198 decay, and the strength of the barrier to gene flow,  $B$ , can be estimated as the ratio between the  
199 difference in the allele frequency and the initial gradient in gene frequency with distance  $x$  at the edges  
200 of the central segment (Szymura & Barton, 1986). In the symmetrical ‘Sstep’ model,  $\theta$  and  $B$  are equal  
201 on both sides. In the asymmetrical ‘Astep’ model, the pattern of introgression is different on the left  
202 and right side.

203 ANALYSE uses the Metropolis algorithm to search the likelihood surface to find the optimal  
204 solution to the model. To ensure that the likelihood surface was thoroughly explored, independent runs  
205 were conducted using a range of initial parameter estimates. After obtaining maximum likelihood  
206 (ML) solutions for the three cline models, the most likely model was identified using Likelihood Ratio  
207 Tests. As the minimum and maximum mean allele frequency or trait values ( $p(z)_{\min}$ ,  $p(z)_{\max}$ ) were  
208 allowed to vary in the tails of the cline, the sigmoid, Sstep and Astep models were described by 2 ( $c$ ,  
209  $w$ ), 4 ( $c$ ,  $w$ ,  $\theta$ ,  $B$ ) and 6 parameters ( $c$ ,  $w$ ,  $\theta_0$ ,  $\theta_1$ ,  $B_0$ ,  $B_1$ ), respectively.

210 After model selection, support limits were estimated for each parameter in the ML model.  
211 Starting with the optimum fit, and constraining the values of all other parameters, the likelihood  
212 surface for individual parameters were explored by making 10,000 random changes of their value. The  
213 range of estimates that was within 2 log-likelihood units of the maximum estimate was taken as the  
214 support limit for that parameter, and is approximately equivalent to a 95% confidence interval.

215 Coincidence of cline centres ( $c$ ) and concordance of cline widths ( $w$ ) were tested using the  
216 composite likelihood method (Kawakami, Butlin, Adams, Paull, & Cooper, 2009; Phillips, Baird, &  
217 Moritz, 2004). The method involves obtaining a composite ML score for a given parameter ( $ML_{\text{comp}}$ )  
218 and comparing it with the sum of the ML estimates obtained for each profile ( $ML_{\text{sum}}$ ).  $ML_{\text{comp}}$  was  
219 obtained by constructing a log-likelihood profile (10 km intervals for  $c$  and  $w$ , between 0 km and 1000  
220 km) with all other parameters allowed to vary, summing the profiles, and obtaining the ML estimate;  
221  $ML_{\text{sum}}$  was obtained by summing the ML estimates from each profile. If clines are not coincident or  
222 concordant,  $ML_{\text{sum}}$  is significantly smaller than  $ML_{\text{comp}}$ , as determined by a chi-squared test ( $\alpha = 0.05$ )  
223 with  $n-1$  degrees of freedom, where  $n$  is the number of traits. One complication with this method for  
224 comparing cline parameters is that the profiles for each trait must be built using the same model.  
225 Although the more complex Sstep and Astep models are a significantly better fit than the sigmoid  
226 model, the parameters estimates for the cline centre and cline width were highly similar regardless of  
227 the model fit (see results). Therefore, all likelihood profiling was conducted with the sigmoid model.

228 To estimate the strength of selection acting on  $y_{wc}$ , the following equation was used from  
229 Barton and Gale (1993):

230 
$$s^* = (1.782\sigma/w)^2$$

231 Where  $s^*$  is the difference in mean fitness between populations at the edge of the cline, and  
232 populations at the centre. This demonstrates the mean strength of effective selection on loci underlying  
233 a trait required to maintain a cline of width ( $w$ ), given the dispersal distance per generation ( $\sigma$ ).  
234 Dispersal estimates were taken from Mallet et al. (1990) and Blum (2002).

235

### 236 *Sequencing data*

237 Restriction-associated DNA (RAD) sequence data were generated for 265 *H. erato* (SI Table S2), and  
238 whole genome re-sequencing was carried out on 36 *H. melpomene* individuals (SI Table S3). Genomic

239 DNA was extracted from each individual using DNeasy Blood and Tissue Kits (Qiagen). Library  
240 preparation and sequencing was carried out by Edinburgh Genomics (University of Edinburgh).

241 Single-digest RAD libraries were prepared using *Pst*I restriction enzyme, with eight base-pair  
242 barcodes and sequenced on the Illumina HiSeq 2500 platform (v4 chemistry), generating an average of  
243 554,826 125 base paired-end reads per individual (see SI Table S2 for coverage and accession  
244 information). We demultiplexed the pooled reads using the RADpools program in the RADtools  
245 package version 1.2.4 (Baxter et al., 2011).

246 TruSeq Nano, gel-free libraries were prepared from genomic DNA samples of 36 *H. melpomene*  
247 individuals and sequenced on Illumina HiSeq 2500 platform (v4 chemistry), generating an average of  
248 31,484,363 125 base paired-end reads per individual (see SI Table S3 for coverage and accession  
249 information).

250 We checked the quality of all the raw sequencing reads using FastQC (v 0.11.5) and removed any  
251 remaining adapters using Trim Galore (v 0.4.1). We aligned the sequence data of all individuals, both  
252 RAD sequenced and WGS, to their corresponding reference genomes, either *Heliconius melpomene*  
253 version 2 (Davey et al., 2016) or *Heliconius erato* (Van Belleghem et al., 2017), obtained from lepbase  
254 (Challis, Kumar, Dasmahapatra, Jiggins, & Blaxter, 2016), using bowtie2 (v 2.3.2), with the local  
255 alignment option, and the very-sensitive pre-set parameter options to improve accuracy of the  
256 alignment. We used samtools (v 1.3.1) to sort and index the alignment files. We removed any  
257 duplicates that may have arisen during library preparation using the MarkDuplicates program in Picard  
258 tools (v 1.92).

259

## 260 *Population structure*

261 SNP datasets were generated using samtools mpileup (v 1.5) to compute genotype likelihoods and  
262 bcftools (v 1.5) for variant calling. For a site to be a variant, the probability that it was homozygous for  
263 the reference allele across all samples was required to be less than 0.05. Multiallelic sites, insertions

264 and deletions were ignored. For *H. melpomene* we identified 30,027,707 single nucleotide  
265 polymorphisms (SNPs), and for *H. erato* we identified 5,088,449 SNPs. SNPs were filtered out that  
266 had a phred quality score lower than 30, that lacked sequence data in 50% or more of the individuals,  
267 that had a minor allele frequency lower than 0.05 and that were private variants. We pruned based on  
268 linkage disequilibrium, discarding SNPs within a 20kb window with  $r^2 > 0.8$ , using the bcftools plugin  
269 '+prune'. This reduced the initial number of called SNPs down to 9,336,937 in *H. melpomene* and  
270 159,405 in *H. erato*.

271 To examine population structure, we first estimated the ancestry of each individual using the  
272 software NGSadmix (Skotte, Korneliussen, & Albrechtsen, 2013), which estimates the proportion of  
273 each genome that can be attributed to predefined number of genetic clusters ( $k$ ) using genotype  
274 likelihoods. For each species, NGSadmix was run for a range of values of  $k$ , one to ten, each being  
275 replicated ten times with a random seed. The value of  $k$  which best describes the population structure  
276 of each individual was determined using the  $\Delta k$  criterion (Evanno, Regnaut, & Goudet, 2005),  
277 implemented in CLUMPAK (Kopelman, Mayzel, Jakobsson, Rosenberg, & Mayrose, 2015).

278 We carried out a principal components analysis (PCA) using PCAngsd (Meisner &  
279 Albrechtsen, 2018), which estimates a covariance matrix based on genotype likelihoods. We used  
280 eigenvector decomposition to retrieve the principal components of genetic structure.

281

## 282 *Population differentiation*

283 To test the extent of genetic differentiation between the iridescent and non-iridescent subspecies, we  
284 first measured  $F_{ST}$  between all the individuals from the iridescent populations south of the hybrid zone,  
285 and all the non-iridescent individuals north of the hybrid zone, excluding the sampling site Jaqué,  
286 which was in the centre of the hybrid zone in both species. SNP datasets were generated for each  
287 species, using samtools mpileup and bcftools (v 1.5). In each species Hudson's  $F_{ST}$  estimator was  
288 calculated among populations (Hudson, Slatkin, & Maddison, 1992):

289 
$$F_{ST}^{Hudson} = 1 - \frac{Hw}{Hb} = \frac{p_1(1 - p_1) + p_2(1 - p_2)}{p_1(1 - p_2) + p_2(1 - p_1)}$$

290 Where  $Hw$  is the within-population heterozygosity,  $Hb$  is the between-population  
291 heterozygosity, and  $p_1$  and  $p_2$  represent the allele frequencies in each population. This was calculated  
292 in  $R$  for every SNP with a custom script. Average genome-wide  $F_{ST}$  was calculated as a ratio of  
293 averages, by averaging the variance components,  $Hw$  and  $Hb$ , separately, as recommended by Bhatia  
294 *et al.* (2013). We also estimated average genome-wide  $F_{ST}$  between all pairs of populations, including  
295 those in the hybrid zone, for each species, and plotted pairwise  $F_{ST}$  against pairwise geographic  
296 distance.

297

### 298 *Comparison of phenotypic and genomic clines*

299 If iridescence varies across the hybrid zone in a similar way to the background genetic structure, this  
300 may suggest that variation is a result of neutral diffusion across a zone of secondary contact. If  
301 iridescence is under divergent selection, we would expect genes which contribute to this trait to  
302 introgress less between the iridescent and non-iridescent populations than neutral alleles, and the  
303 iridescence cline to be narrower than a cline in average ancestry [e.g. (Scordato *et al.*, 2017)]. We  
304 compared the shape and position of clines in iridescence with clines in genetic structure across the  
305 hybrid zones.

306 To fit a cline in genetic structure, we used ancestry proportions estimated by NGSadmix for  
307  $K=2$ , and calculated mean admixture proportions for each site across the hybrid zone in each species.  
308 We then fit geographic cline models to variation in the admixture proportion across sampled  
309 populations using ANALYSE, and tested whether iridescence and admixture clines had coincident  
310 centres and concordant widths, using the likelihood profiling approach described above.

311

312

## 313 Results

### 314 *Phenotypic Variation*

315 Strong phenotypic variation was observed across our range of sampling sites, with some difference  
316 apparent between *H. erato* and *H. melpomene* (Figure 2). The West Colombian yellow bar allele ( $y_{wc}$ )  
317 was fixed in all Colombian sampling sites, apart from at some of the northernmost Colombian  
318 sampling sites near Bahía Solano (Figure 2 A,B). In *H. melpomene*, the frequency of  $y_{wc}$  gradually  
319 decreased, and persisted at comparable frequencies to the North Colombian yellow bar allele (Y) for  
320 ~200 km, before the Central American yellow bar allele ( $y_{ca}$ ) became predominant (Figure 2D). In  
321 contrast, in *H. erato* Y became the predominant allele, with  $y_{ca}$  approaching fixation towards the end of  
322 the transect (Figure 2C).

323 In both species the blue score, used as a proxy measure for iridescence, decreased across the  
324 transect (Figure 2 A,B). The colour measurements used to calculate the blue score were highly  
325 repeatable ( $p < 0.001$  for both red and blue values in both wing patches measured, Table S5). The bluest  
326 *H. melpomene* individuals were less blue than the bluest *H. erato* (Figure 2), which is consistent with  
327 reflectance spectrometry data from *H. erato cyrbia* and *H. melpomene cythera* (Parnell et al., 2018)

328

### 329 *Geographic clines in colour patterns*

330 To compare the selection regime acting on iridescence and the yellow bar in *H. erato* and *H.*  
331 *melpomene*, clines were modelled on variation in the blue score (BR) (Figure 3A, B), and the  
332 frequency of the  $y_{wc}$  allele (Figure 3C, D) across the transect. The cline fitting revealed that an  
333 asymmetrical stepped cline best described the variation in iridescence in *H. erato*, with a steeper right  
334 tail extending north into Panama. Neither stepped model was a significantly better fit than sigmoidal  
335 clines for the yellow bar in *H. erato*, and both colour traits in *H. melpomene* (Table 1; SI Table S6).

336 Likelihood profiling revealed that both iridescence and the yellow bar clines were coincident  
337 (i.e. the same cline centre) between species, however the iridescence cline was significantly wider in  
338 *H. melpomene* (Table 2). The yellow bar widths were not significantly different between species  
339 (Table 2), despite non-overlapping support limits (Table 1), possibly due to gaps in sampling. Within  
340 each species, clines in both colour traits were coincident and concordant (Table 2).

341 We estimated effective selection ( $s^*$ ) on  $y_{wc}$  across the hybrid zone in both species using the  
342 ML estimates and two log-likelihood support limits of cline width (Table 1), and dispersal estimates  
343 from Mallet et al. (1990), 2.6 km for *H. erato* and 3.7 km for *H. melpomene*. For *H. erato*  $s^*=0.00203$   
344 (0.00102–0.00427), and for *H. melpomene*  $s^*=0.000213$  (0.000165–0.000303). Blum (2002) estimates  
345 higher dispersal for *H. erato*, 10 km, which increases the value of  $s^*$  to 0.0300 (0.0151–0.0632). Given  
346 that the widths of the yellow bar and iridescence clines were not different within each species, similar  
347 estimates are found for iridescence. For *H. melpomene*,  $s^*=0.000200$  (0.000135–0.000300), for *H.*  
348 *erato*,  $s^*=0.00208$  (0.00167–0.00267) if the dispersal distance is 2.6 km, and 0.0307 (0.0247–0.0395)  
349 if the dispersal distance is 10 km. However, it should be noted that in the case of iridescence,  $s^*$  is the  
350 average strength of selection acting across loci controlling iridescence.

351

### 352 *Population Structure*

353 We investigated population structure using genome-wide SNP data in the programs NGSadmix, to  
354 estimate ancestry proportions from a varying number of genetic clusters ( $K$ ), and PCAngsd to confirm  
355 population clustering by principal components (PCA). This revealed different patterns of population  
356 structure in the co-mimics. In *H. erato*, NGSadmix supported  $K=2$  (SI Figure S2B), representing a  
357 “Panama-like” and a “Colombia-like” genetic background (Figure 4B), with individuals of  
358 consistently mixed ancestry found in the site closest to the centre of the iridescence cline.  
359 Introgression from Panamanian populations could be detected in northern Colombian populations. The  
360 PCA supported this, with three clusters separated by geography along the first axis of variation,  
361 representing the Colombian populations, the Panamanian populations, and individuals with mixed

362 ancestry and intermediate levels of iridescence clustered between them (Figure 4C). PC1 explained  
363 5.84% of genetic variation in *H. erato*, with all subsequent eigenvectors explaining 0.7% or less of the  
364 genetic variation (SI Figure S3).

365 NGSadmix also supported  $K=2$  for *H. melpomene* (although  $K=1$  cannot be tested, SI Figure  
366 S2D), but revealed a less straightforward population structure. While a “Colombia-like” genetic  
367 background could be seen, Panamanian individuals showed mixed ancestry, with the exception of two  
368 individuals from the site closest to the centre of the iridescence cline (Figure 4D). This is supported by  
369 the PCA. PC1 explained 5.28% of genetic variation, separating Colombian and Panamanian  
370 individuals. Individuals with intermediate levels of iridescence do not form an intermediate cluster  
371 between Panamanian and Colombian individuals, as is seen in *H. erato* (Figure 4E). The percent of  
372 genetic variation explained by PC1 and subsequent principal components show a more uniform  
373 distribution than in *H. erato* (SI Figure S3) consistent with weaker population structure.

374 Using SNPs from individuals either side of the hybrid zone, genome-wide average Hudson’s  
375  $F_{ST}$  was estimated for each species, using the ratio of averages approach. This revealed that genome-  
376 wide divergence across the hybrid zone is greater in *H. erato* ( $F_{ST}=0.188$ ), compared to *H. melpomene*  
377 ( $F_{ST}=0.0739$ ). The difference in genetic structure is also apparent in the plots of the pairwise genetic  
378 distance between sampling locations, plotted against their geographic distance. In *H. erato*, within-  
379 race comparisons that span distances of 195 – 325 km show a range of  $F_{ST}$  values between 0.063 –  
380 0.129. However, between-race comparisons made over a similar range of distances (188 – 345 km)  
381 have substantially higher  $F_{ST}$  (0.226 – 0.271), suggesting that the genetic structure is much stronger  
382 than would be expected based on geography alone (Figure 5). The pattern in *H. melpomene* is very  
383 different, as the between-race comparisons span a similar range of  $F_{ST}$  values to the within-race  
384 comparisons.

385

386



### 387 *Clines in genomic admixture proportion*

388 To test whether variation in iridescence was independent from genetic structure across the  
389 hybrid zone, we compared clines in iridescence and admixture proportion across the transect (Figure  
390 3E, F). An asymmetrical stepped cline model best fits the variation in admixture proportions across the  
391 transect for *H. erato* (Table 1, SI Table S6), with a steeper right tail, similar to the iridescence cline.  
392 However, the admixture proportion cline is not coincident with the cline in iridescence in *H. erato*  
393 (Table 2), with the centre of the iridescence cline estimated to be located significantly further North  
394 (Table 2). The admixture proportion cline is also significantly wider than the iridescence cline in *H.*  
395 *erato*.

396 Neither stepped cline model is a significantly better fit than a sigmoidal model for variation in  
397 admixture proportions in *H. melpomene* (Table 1). The clines in iridescence and admixture proportion  
398 are coincident, but not concordant in *H. melpomene*, with a wider iridescence cline (Table 2).  
399 However, the likelihood profiles reveal a wide range of values for admixture cline centres and widths  
400 with similar likelihoods (SI Figure S4), suggesting the cline model fits poorly to the data. This may be  
401 due to gaps in sampling.

402

## 403 **Discussion**

404 Here, we investigate hybrid zones between different colour pattern races of the Müllerian mimics  
405 *H. erato* and *H. melpomene*, across which both species display continuous variation in iridescent  
406 structural colour. Using comparisons of phenotypic clines, and population genomic approaches, we  
407 investigate the selection regimes acting on iridescence, and the genetic structure of the hybrid zones.

408

### 409 *Phenotypic clines and selection*

410

411 Our geographic cline analysis of colour pattern variation in *H. erato* and *H. melpomene* revealed  
412 that clines in quantitative iridescence and discrete yellow bar traits were not only coincident within  
413 both species, but all colour patterns were coincident between species. Physical linkage is unlikely to

414 play a role in the coincidence of the traits in *H. erato*, as crosses between iridescent and non-iridescent  
415 subspecies of *H. erato* show independent segregation of iridescence and yellow bar phenotypes (Brien  
416 et al., 2018).

417 Under a scenario where the colour pattern clines are maintained by a balance between migration  
418 and direct selection, shared cline centres would be expected if both traits experience a similar strength  
419 of selection, and either the same selective pressure, or any other which changes in approximately the  
420 same location (Barton & Hewitt, 1985). Local warning colour patterns in *Heliconius* are maintained by  
421 predator-mediated positive frequency-dependent selection, with rare colour morphs experiencing  
422 increased predation (Benson, 1972; Dell'aglio, Stevens, & Jiggins, 2016; Langham, 2004; Mallet &  
423 Barton, 1989). The centre of colour pattern clines represents the location where the most effective  
424 warning pattern shifts to that of a neighbouring subspecies. The coincidence of cline centres for  
425 iridescence and  $y_{wc}$ , which is observed in both *H. melpomene* and *H. erato*, is consistent with both  
426 traits being involved in a warning signal. The coincidence of iridescence clines between species  
427 supports a common source of selection, and a role for aposematism and mimicry in the evolution of  
428 iridescence.

429 The shape of clines can provide insight into the balance of direct versus indirect selection acting  
430 on traits (Vines et al., 2016). Concordant, stepped clines (steep clines with flanking tails) indicate that  
431 indirect selection is dominant (Kruuk et al., 1999). In *H. erato*, the two colour pattern clines are  
432 coincident, and the best fitting cline model for variation in iridescence is stepped, however the stepped  
433 cline models are not a significantly better fit than a simple sigmoidal cline for the yellow bar, lending  
434 less support to indirect selection. In addition, while the best fitting cline model for the admixture  
435 proportions is stepped, its centre is significantly different from the colour pattern clines, which again  
436 suggests against indirect selection being the dominant force. Finally, while we do see stepped clines in  
437 *H. erato*, they are both asymmetrical clines, with a very shallow left tail, and a more prominent right  
438 tail. It is therefore more likely that these tails reflect genuine asymmetry, due to hybrid zone  
439 movement, which has been predicted and documented in these species (Blum, 2002; Mallet, 1986;

440 Thurman, Szejner-Sigal, & McMillan, 2019), or asymmetric selection, rather than being due to  
441 indirect selection.

442 In *H. melpomene* the colour pattern clines are estimated to be more than four times wider than the  
443 corresponding traits in *H. erato*, and are not characteristic of the steep, stepped clines which result  
444 from strong LD and indirect selection (e.g. Szymura & Barton, 1991). Wider clines could be a result  
445 of greater dispersal distances. While dispersal distances have not been directly measured in *Heliconius*  
446 butterflies, estimates have been made (Blum, 2002; Mallet et al., 1990), and the only study which  
447 compares the two species reports higher dispersal distances in *H. melpomene* (Mallet et al., 1990).  
448 However our estimates of the selection coefficient  $s^*$  (Barton & Gale, 1993) show that even with  
449 higher dispersal, colour pattern traits in *H. melpomene* appear to be under much weaker selection.  
450 Other studies on parallel hybrid zones between neighbouring races in this species pair show that *H.*  
451 *melpomene* tend to have wider clines than *H. erato*, but not to the degree seen in the present study  
452 (Mallet et al., 1990; Salazar, 2012). *H. melpomene* displays less vivid iridescence than its co-mimic,  
453 and the colour difference between iridescent and non-iridescent *H. melpomene* is less pronounced than  
454 the colour difference between *H. erato* races (Parnell et al., 2018, Figure 1). Hybrid phenotypes are  
455 therefore less distinct from the parental populations in *H. melpomene* which could result in weaker  
456 selection against hybrid offspring.

457

#### 458 *Genetic structure and population history*

459

460 Overall, we found more defined population structure in *H. erato* compared to *H. melpomene*. In *H.*  
461 *erato*, the PCA and estimated admixture proportion support two main genetic clusters, one  
462 representing the non-iridescent Panamanian populations, the other representing the iridescent  
463 Colombian populations. Hybrid zone individuals are consistently of mixed ancestry, indicating  
464 admixture between the two genetic clusters. In addition, pairwise  $F_{ST}$  in between-subspecies  
465 population pairs is consistently higher than within-subspecies population pairs, even when accounting  
466 for geographic distance. This contrasts with Peruvian and Ecuadorian hybrid zones between different

467 *H. erato* races, which comprise of single genetic clusters, indicating hybrid zone formation via  
468 primary intergradation, or ancient secondary contact (Nadeau et al., 2014). It is possible that the *H.*  
469 *erato* hybrid zone in the present study also formed via primary intergradation, with genetic structure  
470 forming as a result of reduced effective migration across the genome due to the combined effects of  
471 divergent selection and the build-up of statistical associations between loci (Flaxman et al., 2014).  
472 Alternatively, the two ancestral groups may have diverged during isolation, with gene flow resuming  
473 upon secondary contact, causing an abrupt discontinuity between genetically differentiated  
474 populations (Barton, 1983). When several traits under selection change simultaneously across a  
475 contact zone, linkage disequilibrium (LD) can be maintained between them, and indirect selection can  
476 therefore predominate (Szymura & Barton, 1986). However, low genome-wide  $F_{ST}$  (0.188), and traces  
477 of introgression of the Panamanian genetic cluster into Colombian populations (from the admixture  
478 proportions), and vice versa, suggests ongoing gene-flow, which would likely break down LD, unless  
479 secondary contact was relatively recent.

480 There is generally weaker population structure in *H. melpomene*. This could be due to greater  
481 levels of dispersal, weaker selection, and/or a primary intergradation scenario. Secondary contact  
482 cannot be ruled out, since there is a genetic discontinuity near the centre of the clines, but if so these  
483 populations were less divergent than the *H. erato* populations, as there is very low genome-wide  $F_{ST}$   
484 (0.0739) between populations either side of the hybrid zone. In addition, the admixture proportions do  
485 not clearly define a Panamanian genetic background, as seen in *H. erato*. Our methods do not allow us  
486 to explicitly test for an absence of genetic structure. The method used to determine the number of  
487 genetic clusters ( $\Delta K$ ) is based on the plateauing of explanatory power with increasing numbers of  
488 genetic clusters (Evanno et al., 2005; Janes et al., 2017), and therefore does not allow us to distinguish  
489 between  $K=1$  and  $K=2$ . However, pairwise  $F_{ST}$  is not greater in between-subspecies comparisons  
490 compared to within-subspecies comparisons, supporting lack of differentiation across the hybrid zone.  
491 It must be noted, however, that we had fewer *H. melpomene* samples, and fewer sampling locations  
492 than for *H. erato*, which may have impacted some of these results.

493

494

495

496 *Genetic differentiation and divergence in a quantitative trait*

497 While the colour pattern traits studied here likely have different genetic architectures, with the yellow

498 bar being controlled by a single major-effect, Mendelian locus (Joron et al., 2006; Mallet, 1986;

499 Nadeau et al., 2016), and iridescence, a quantitative trait, likely being controlled by multiple genes

500 (Brien et al., 2018), phenotypic clines in these traits show close concordance and coincidence within

501 each species. Quantitative trait divergence may require a more complex pattern of genetic

502 differentiation than traits with a Mendelian pattern of inheritance, so reduced gene flow could have

503 facilitated the evolution of iridescence. However, within both species we find evidence that the clines

504 in iridescence are not tightly coupled to clines in genome-wide ancestry. Clines in morphological traits

505 can be uncoupled from background genetic clines when direct natural (Vines et al., 2016), or sexual

506 (Baldassarre, White, Karubian, & Webster, 2014) selection outweighs the effects of indirect selection

507 from other loci in LD. In *H. erato*, the iridescence and admixture proportion clines have significantly

508 different centres. This is particularly striking given the similarities in the phenotypic clines within this

509 species, and suggests that coincidence of colour pattern clines is not simply due to a pattern of

510 genome-wide differentiation, but more likely due to common selective forces maintaining closely

511 correlated clines. Spatial variation in quantitative traits can also be non-adaptive, arising via purely

512 stochastic processes (Storz, 2002). However, the iridescence cline is significantly narrower than the

513 admixture proportion cline suggesting reduced introgression of genes controlling iridescence relative

514 to the genome-wide average, likely due to selection on colour. It is therefore unlikely that the

515 iridescence cline in *H. erato* is a result of neutral diffusion following secondary contact.

516 In *H. melpomene*, we find low overall genetic differentiation. A cline model of admixture

517 proportions based on two genetic clusters has a centre and width not significantly different to the

518 colour pattern clines. However, this is likely due to the poor fit of the cline models to variation in

519 admixture proportions (Figure 4; SI Figure S4), illustrated by the large confidence intervals (Table 1).

520 This is possibly due to gaps in sampling, but the poor fit can also be explained by the less defined

521 population structure in this species. Also, clear phenotypic intermediates in the hybrid zone are not  
522 predicted to be of mixed ancestry (Figures 3, 4). This suggests that divergence in iridescence in this  
523 species is independent of any extensive genomic differentiation and that the broad phenotypic clines  
524 that we see are due to weak selection over large distances.

525

### 526 *Conclusions*

527 This unique system allowed us to compare genetic and phenotypic patterns of divergence in  
528 convergent traits that show both discrete and quantitative variation. Despite different patterns of  
529 population structure and genomic divergence, the co-mimics *H. erato* and *H. melpomene* have formed  
530 parallel clines in iridescence, and the evidence appears to support direct selection plays a role in  
531 maintaining these clines. This is likely due to iridescence playing a role in the mimetic warning signal,  
532 despite the weaker selection which appears to be operating in *H. melpomene*.

533 While pigmentation has a long history in our understanding of the link between genotype and  
534 phenotype, we have barely scratched the surface of our understanding of the genetic control of  
535 structural colour. This natural system is a promising candidate for association or admixture mapping,  
536 and could allow us to identify genomic regions controlling structural colour for the first time.

537

### 538 **Acknowledgements**

539 Thanks to the governments of Panama and Colombia (ANLA- Permit 0530) for giving permission to  
540 collect butterfly specimens. Thanks to the McMillan and Jiggins labs for providing access to samples.  
541 Thanks also to Patricio Salazar, Juan Enciso, Juan Camilo Dumar, Melanie Brien, Carlos Arias, Agata  
542 Surma and others in Panama and Colombia, in particular the residents of Jaqué, Darién, for help with  
543 logistics and collecting in the field. Thanks to Roger Butlin for valuable comments on this manuscript.  
544 This work was funded by the UK Natural Environment Research Council (NERC) through an  
545 Independent Research Fellowship (NE/K008498/1) to NJN, and by The Royal Society through an

546 International Exchange Scheme grant. EVC was funded by the NERC doctoral training partnership,  
547 ACCE. CS and CP were funded by COLCIENCIAS (Grant FP44842-5-2017).

548

## 549 References

550 Abràmoff, M. D., Magalhães, P. J., & Ram, S. J. (2004). Image processing with imageJ. *Biophotonics*  
551 *International*, 11(7), 36–41. <https://doi.org/10.1117/1.3589100>

552 Arias, C. F., Muñoz, A. G., Jiggins, C. D., Mavárez, J., Bermingham, E., & Linares, M. (2008). A  
553 hybrid zone provides evidence for incipient ecological speciation in *Heliconius* butterflies.  
554 *Molecular Ecology*, 17(21), 4699–4712. <https://doi.org/10.1111/j.1365-294X.2008.03934.x>

555 Barton, N. H. (1983). Multilocus Clines. *Evolution*, 37(3), 454–471. <https://doi.org/10.2307/2408260>

556 Barton, N. H., & Hewitt, G. M. (1985). Analysis of Hybrid Zones. *Annual Review of Ecology and*  
557 *Systematics*, Vol. 16, pp. 113–148. <https://doi.org/10.1146/annurev.es.16.110185.000553>

558 Barton, N. H., & Baird, S. J. E. (2002). *Analyse. Version 1.30*. Retrieved from  
559 <http://archive.bio.ed.ac.uk/software/Mac/Analyse/index.html>

560 Barton, N. H., & Gale, K. S. (1993). Genetic analysis of hybrid zones. In R. G. Harrison (Ed.), *Hybrid*  
561 *zones and the evolutionary process* (pp. 13–45). Retrieved from  
562 [https://books.google.co.uk/books?id=aFJFkVKskYIC&pg=PA13&source=gbs\\_toc\\_r&cad=4#v=](https://books.google.co.uk/books?id=aFJFkVKskYIC&pg=PA13&source=gbs_toc_r&cad=4#v=onepage&q&f=false)  
563 [onepage&q&f=false](https://books.google.co.uk/books?id=aFJFkVKskYIC&pg=PA13&source=gbs_toc_r&cad=4#v=onepage&q&f=false)

564 Baxter, S W, Johnston, S. E., & Jiggins, C. D. (2009). Butterfly speciation and the distribution of gene  
565 effect sizes fixed during adaptation. *Heredity*, 102, 57–65. <https://doi.org/10.1038/hdy.2008.109>

566 Baxter, S. W., Davey, J. W., Johnston, J. S., Shelton, A. M., Heckel, D. G., Jiggins, C. D., & Blaxter,  
567 M. L. (2011). Linkage Mapping and Comparative Genomics Using Next-Generation RAD  
568 Sequencing of a Non-Model Organism. *PLoS ONE*, 6(4), e19315.  
569 <https://doi.org/10.1371/journal.pone.0019315>

570 Benson, W. (1972). Natural Selection for Mullerian Mimicry in *Heliconius erato* in Costa Rica.  
571 *Science*, 176(4037), 936–939. Retrieved from  
572 <http://www.sciencemag.org/content/176/4037/936.short>

573 Bhatia, G., Patterson, N., Sankararaman, S., & Price, A. L. (2013). Estimating and interpreting  $F_{ST}$ :  
574 The impact of rare variants. *Genome Research*, 23(9), 1514–1521.  
575 <https://doi.org/10.1101/gr.154831.113>

576 Blum, M. J. (2002). Rapid movement of a *Heliconius* hybrid zone: evidence for phase III of Wright's  
577 shifting balance theory? *Evolution; International Journal of Organic Evolution*, 56(10), 1992–  
578 1998. [https://doi.org/10.1554/0014-3820\(2002\)056\[1992:RMOAHH\]2.0.CO;2](https://doi.org/10.1554/0014-3820(2002)056[1992:RMOAHH]2.0.CO;2)

579 Brien, M. N., Enciso-Romero, J., Parnell, A. J., Salazar, P. A., Morochz, C., Chalá, D., ... Nadeau, N.  
580 J. (2018). Phenotypic variation in *Heliconius erato* crosses shows that iridescent structural colour  
581 is sex-linked and controlled by multiple genes. *Interface Focus*, 9(1), 20180047.  
582 <https://doi.org/10.1098/rsfs.2018.0047>

583 Brown, K. S. (1981). The Biology of *Heliconius* and Related Genera. *Annual Review of Entomology*,  
584 26(1), 427–457. <https://doi.org/10.1146/annurev.en.26.010181.002235>

585 Challis, R. J., Kumar, S., Dasmahapatra, K. K., Jiggins, C. D., & Blaxter, M. (2016). Lepbase: The  
586 Lepidopteran genome database. *BioRxiv*, 056994. <https://doi.org/10.1101/056994>

- 587 Davey, J. W., Chouteau, M., Barker, S. L., Maroja, L., Baxter, S. W., Simpson, F., ... Jiggins, C. D.  
588 (2016). Major Improvements to the *Heliconius melpomene* Genome Assembly Used to Confirm  
589 10 Chromosome Fusion Events in 6 Million Years of Butterfly Evolution. *G3*  
590 *Genes/Genomes/Genetics*, 6(3), 695–708. <https://doi.org/10.1534/g3.115.023655>
- 591 Dell'aglio, D. D., Stevens, M., & Jiggins, C. D. (2016). Avoidance of an aposematically coloured  
592 butterfly by wild birds in a tropical forest. *Ecological Entomology*, 41(5), 627–632.  
593 <https://doi.org/10.1111/een.12335>
- 594 Derryberry, E. P., Derryberry, G. E., Maley, J. M., & Brumfield, R. T. (2013). Hzar: Hybrid zone  
595 analysis using an R software package. *Molecular Ecology Resources*, 14(3), 652–663.  
596 <https://doi.org/10.1111/1755-0998.12209>
- 597 Endler, J. A. (1977). *Geographic variation, speciation, and clines*. Princeton, New Jersey: Princeton  
598 University Press.
- 599 Evanno, G., Regnaut, S., & Goudet, J. (2005). Detecting the number of clusters of individuals using  
600 the software STRUCTURE: A simulation study. *Molecular Ecology*, 14(8), 2611–2620.  
601 <https://doi.org/10.1111/j.1365-294X.2005.02553.x>
- 602 Flaxman, S. M., Wacholder, A. C., Feder, J. L., & Nosil, P. (2014). Theoretical models of the  
603 influence of genomic architecture on the dynamics of speciation. *Molecular Ecology*, 23(16),  
604 4074–4088. <https://doi.org/10.1111/mec.12750>
- 605 Gay, L., Crochet, P. a., Bell, D. a., & Lenormand, T. (2008). Comparing clines on molecular and  
606 phenotypic traits in hybrid zones: A window on tension zone models. *Evolution*, 62(11), 2789–  
607 2806. <https://doi.org/10.1111/j.1558-5646.2008.00491.x>
- 608 Gompert, Z., Mandeville, E. G., & Buerkle, C. A. (2017). Analysis of Population Genomic Data from  
609 Hybrid Zones. *Annual Review of Ecology, Evolution, and Systematics*, 48(1), 207–229.  
610 <https://doi.org/10.1146/annurev-ecolsys-110316-022652>
- 611 Hudson, R. R., Slatkin, M., & Maddison, W. P. (1992). Estimation of levels of gene flow from DNA  
612 sequence data. *Genetics*, 132(2), 583–589. <https://doi.org/PMC1205159>
- 613 Janes, J. K., Miller, J. M., Dupuis, J. R., Malenfant, R. M., Gorrell, J. C., Cullingham, C. I., &  
614 Andrew, R. L. (2017). The  $K = 2$  conundrum. *Molecular Ecology*, 26(14), 3594–3602.  
615 <https://doi.org/10.1111/mec.14187>
- 616 Joron, M., Papa, R., Beltrán, M., Chamberlain, N., Mavárez, J., Baxter, S., ... Jiggins, C. D. (2006). A  
617 conserved supergene locus controls colour pattern diversity in *Heliconius* butterflies. *PLoS*  
618 *Biology*, 4(10), 1831–1840. <https://doi.org/10.1371/journal.pbio.0040303>
- 619 Kawakami, T., Butlin, R. K., Adams, M., Paull, D. J., & Cooper, S. J. B. (2009). Genetic analysis of a  
620 chromosomal hybrid zone in the Australian morabine grasshoppers (*Vandiemenella*, *viatica*  
621 species group). *Evolution*, 63(1), 139–152. <https://doi.org/10.1111/j.1558-5646.2008.00526.x>
- 622 Kopelman, N. M., Mayzel, J., Jakobsson, M., Rosenberg, N. A., & Mayrose, I. (2015). Clumpak: A  
623 program for identifying clustering modes and packaging population structure inferences across  
624 K. *Molecular Ecology Resources*, 15(5), 1179–1191. <https://doi.org/10.1111/1755-0998.12387>
- 625 Kronforst, M. R., Young, L. G., Kapan, D. D., Mcneely, C., Neill, R. J. O., & Gilbert, L. E. (2006).  
626 Linkage of butterfly mate preference and wing color preference cue at the genomic location of  
627 wingless. *Proceedings of the National Academy of Sciences*, 103(17), 6575–6580.
- 628 Kruuk, L. E. B., Baird, S. J. E., Gale, K. S., & Barton, N. H. (1999). A Comparison of Multilocus  
629 Clines Maintained by Environmental Adaptation or by Selection Against Hybrids. *Genetics*,  
630 153(4), 1959–1971.



- 631 Langham, G. M. (2004). Specialized Avian Predators Repeatedly Attack Novel Color Morphs of  
632 *Heliconius* Butterflies. *Evolution*, 58(12), 2783–2787.
- 633 Lango Allen, H., Estrada, K., Lettre, G., Berndt, S. I., Weedon, M. N., Rivadeneira, F., ... Hirschhorn,  
634 J. N. (2010). Hundreds of variants clustered in genomic loci and biological pathways affect  
635 human height. *Nature*, 467(7317), 832–838. Retrieved from  
636 <http://dx.doi.org/10.1038/nature09410>
- 637 Le Corre, V., & Kremer, A. (2012). The genetic differentiation at quantitative trait loci under local  
638 adaptation. *Molecular Ecology*, 21(7), 1548–1566. [https://doi.org/10.1111/j.1365-](https://doi.org/10.1111/j.1365-294X.2012.05479.x)  
639 [294X.2012.05479.x](https://doi.org/10.1111/j.1365-294X.2012.05479.x)
- 640 Mallet, J. (1989). The Genetics of Warning Colour in Peruvian Hybrid Zones of *Heliconius erato* and  
641 *H. melpomene*. *Proceedings of the Royal Society B: Biological Sciences*, 236(1283), 163–185.  
642 <https://doi.org/10.1098/rspb.1989.0019>
- 643 Mallet, J. (1986). Hybrid zones of *Heliconius* butterflies in Panama and the stability and movement of  
644 warning colour clines. *Heredity*, 56(2), 191–202. <https://doi.org/10.1038/hdy.1986.31>
- 645 Mallet, J. (1993). Speciation, raiation, and color pattern evolution in *Heliconius* butterflies: evidence  
646 from hybrid zones. In Richard G Harrison (Ed.), *Hybrid zones and the evolutionary process* (pp.  
647 226–260). New York: Oxford University Press.
- 648 Mallet, J., Barton, N. H., Gerardo Lamas, M., Jose Santisteban, C., Manuel Muedas, M., & Eeley, H.  
649 (1990). Estimates of selection and gene flow from measures of cline width and linkage  
650 disequilibrium in *Heliconius* hybrid zones. *Genetics*, 124, 921–936.
- 651 Mallet, J., & Barton, N. H. (1989). Strong Natural Selection in a Warning-Color Hybrid Zone.  
652 *Evolution*, 43(2), 421–431. <https://doi.org/10.2307/2409217>
- 653 Martin, A., Papa, R., Nadeau, N. J., Hill, R. I., Counterman, B. A., Halder, G., ... Reed, R. D. (2012).  
654 Diversification of complex butterfly wing patterns by repeated regulatory evolution of a Wnt  
655 ligand. *Proceedings of the National Academy of Sciences*, 109(31), 12632–12637.  
656 <https://doi.org/10.1073/pnas.1204800109>
- 657 Martin, S. H., Dasmahapatra, K. K., Nadeau, N. J., Slazar, C., Walters, J. R., Simpson, F., ... Jiggins,  
658 C. D. (2013). Genome-wide evidence for speciation with gene flow in *Heliconius* butterflies.  
659 *Genome Research*, 23, 1817–1828. <https://doi.org/10.1101/gr.159426.113>
- 660 Meisner, J., & Albrechtsen, A. (2018). Inferring Population Structure and Admixture Proportions in  
661 Low Depth Next-Generation Sequencing Data. *BioRxiv*, 302463. <https://doi.org/10.1101/302463>
- 662 Milano, E. R., Kenney, A. M., & Juenger, T. E. (2016). Adaptive differentiation in floral traits in the  
663 presence of high gene flow in scarlet gilia (*Ipomopsis aggregata*). *Molecular Ecology*, 25(23),  
664 5862–5875. <https://doi.org/10.1111/mec.13752>
- 665 Nadeau, N. J. (2016). Genes controlling mimetic colour pattern variation in butterflies. *Current*  
666 *Opinion in Insect Science*, Vol. 17, pp. 24–31. <https://doi.org/10.1016/j.cois.2016.05.013>
- 667 Nadeau, N. J., Pardo-Diaz, C., Whibley, A., Supple, M. A., Saenko, S. V., Wallbank, R. W. R., ...  
668 Jiggins, C. D. (2016). The gene cortex controls mimicry and crypsis in butterflies and moths.  
669 *Nature*, 534(7605), 106–110. <https://doi.org/10.1038/nature17961>
- 670 Nadeau, N. J., Ruiz, M., Salazar, P., Counterman, B., Medina, J. A., Ortiz-Zuazaga, H., ... Papa, R.  
671 (2014). Population genomics of parallel hybrid zones in the mimetic butterflies, *H. melpomene*  
672 and *H. erato*. *Genome Research*, 24(8), 1316–1333. <https://doi.org/10.1101/gr.169292.113>
- 673 Nadeau, N. J., Whibley, A., Jones, R. T., Davey, J. W., Dasmahapatra, K. K., Baxter, S. W., ...

- 674 Jiggins, C. D. (2012). Genomic islands of divergence in hybridizing *Heliconius* butterflies  
675 identified by large-scale targeted sequencing. *Philosophical Transactions of the Royal Society B:*  
676 *Biological Sciences*, 367(1587), 343–353. <https://doi.org/10.1098/rstb.2011.0198>
- 677 Parnell, A. J., Bradford, J. E., Curran, E. V., Washington, A. L., Adams, G., Brien, M. N., ... Nadeau,  
678 N. J. (2018). Wing scale ultrastructure underlying convergent and divergent iridescent colours in  
679 mimetic *Heliconius* butterflies. *Journal of The Royal Society Interface*, 15(141), 20170948.  
680 <https://doi.org/10.1098/rsif.2017.0948>
- 681 Phillips, B. L., Baird, S. J. E., & Moritz, C. (2004). When Vicars Meet: A Narrow Contact Zone  
682 between Morphologically Cryptic Phylogeographic Lineages of the Rainforest Skink, *Carlia*  
683 *rubrigularis*. *Evolution*, 58(7), 1536–1548.
- 684 Poelstra, J. W., Vijay, N., Bossu, C. M., Lantz, H., Ryll, B., Muller, I., ... Wolf, J. B. W. (2014). The  
685 genomic landscape underlying phenotypic integrity in the face of gene flow in crows. *Science*,  
686 344(6190), 1410–1414. <https://doi.org/10.1126/science.1253226>
- 687 Reed, R. D., Papa, R., Martin, A., Hines, H. M., Counterman, B. a, Pardo-Diaz, C., ... McMillan, W.  
688 O. (2011). Optix Drives the Repeated Convergent Evolution of Butterfly Wing Pattern Mimicry.  
689 *Science*, 333(6046), 1137–1141. <https://doi.org/10.1126/science.1208227>
- 690 Rosser, N, Phillimore, A. B., Huertas, B. C., Willmott, K. R., & Mallet, J. (2012). Testing historical  
691 explanations for gradients in species richness in heliconiine butterflies of tropical America.  
692 *Biological Journal of the Linnean Society*, 105, 479–497. [https://doi.org/10.1111/j.1095-](https://doi.org/10.1111/j.1095-8312.2011.01814.x)  
693 [8312.2011.01814.x](https://doi.org/10.1111/j.1095-8312.2011.01814.x)
- 694 Rosser, N., Dasmahapatra, K. K., & Mallet, J. (2014). Stable *Heliconius* butterfly hybrid zones are  
695 correlated with a local rainfall peak at the edge of the Amazon basin. *Evolution*, 68(12), 3470–  
696 3484. <https://doi.org/10.1111/evo.12539>
- 697 Scordato, E. S. C., Wilkins, M. R., Semenov, G., Rubtsov, A. S., Kane, N. C., & Safran, R. J. (2017).  
698 Genomic variation across two barn swallow hybrid zones reveals traits associated with  
699 divergence in sympatry and allopatry. *Molecular Ecology*, 26(20), 5676–5691.  
700 <https://doi.org/10.1111/mec.14276>
- 701 Skotte, L., Korneliussen, T. S., & Albrechtsen, A. (2013). Estimating individual admixture proportions  
702 from next generation sequencing data. *Genetics*, 195(3), 693–702.  
703 <https://doi.org/10.1534/genetics.113.154138>
- 704 Stankowski, S., Sobel, J. M., & Streisfeld, M. A. (2015). The geography of divergence with gene flow  
705 facilitates multitrait adaptation and the evolution of pollinator isolation in *Mimulus aurantiacus*.  
706 *Evolution*, 69(12), 3054–3068. <https://doi.org/10.1111/evo.12807>
- 707 Supple, M. A., Hines, H. M., Dasmahapatra, K. K., Lewis, J. J., Nielsen, D. M., Lavoie, C., ...  
708 Counterman, B. A. (2013). Genomic architecture of adaptive color pattern divergence and  
709 convergence in *Heliconius* butterflies. *Genome Research*, 23, 1248–1257.  
710 <https://doi.org/10.1101/gr.150615.112.1248>
- 711 Sweeney, A., Jiggins, C., & Johnsen, S. (2003). Polarized light as a butterfly mating signal. *Nature*,  
712 423(6935), 31–32. <https://doi.org/10.1038/423031a>
- 713 Szymura, J. M., & Barton, N. H. (1991). The genetic structure of the hybrid zone between the fire-  
714 bellied toads *Bombina bombina* and *B. variegata*: comparisons between transects and between  
715 loci. *Evolution*, 45(2), 237–261. <https://doi.org/10.2307/2408943>
- 716 Szymura, J. M., & Barton, N. H. (1986). Genetic Analysis of a Hybrid Zone Between the Fire-Bellied  
717 Toads, *Bombina bombina* and *B. variegata*, Near Cracow in Southern Poland. *Evolution*, 40(6),

718 1141–1159.

719 Thurman, T. J., Szejner-Sigal, A., & McMillan, W. O. (2019). Movement of a *Heliconius* hybrid zone  
720 over 30 years: A Bayesian approach. *Journal of Evolutionary Biology*, 32(9), 974–983.  
721 <https://doi.org/10.1111/jeb.13499>

722 Toews, D. P. L., Taylor, S. A., Vallender, R., Brelsford, A., Butcher, B. G., Messer, P. W., & Lovette,  
723 I. J. (2016). Plumage Genes and Little Else Distinguish the Genomes of Hybridizing Warblers.  
724 *Current Biology*, 26(17), 2313–2318. <https://doi.org/10.1016/j.cub.2016.06.034>

725 Van Belleghem, S. M., Rastas, P., Papanicolaou, A., Martin, S. H., Arias, C. F., Supple, M. A., ...  
726 Papa, R. (2017). Complex modular architecture around a simple toolkit of wing pattern genes.  
727 *Nature Ecology and Evolution*, 1(3), 1–12. <https://doi.org/10.1038/s41559-016-0052>

728 Vines, T. H., Dalziel, A. C., Albert, A. Y. K., Veen, T., Schulte, P. M., & Schluter, D. (2016). Cline  
729 coupling and uncoupling in a stickleback hybrid zone. *Evolution*, 70(5), 1023–1038.  
730 <https://doi.org/10.1111/evo.12917>

731 Westerman, E. L., VanKuren, N. W., Massardo, D., Tenger-Trolander, A., Zhang, W., Hill, R. I., ...  
732 Kronforst, M. R. (2018). Aristaless Controls Butterfly Wing Color Variation Used in Mimicry  
733 and Mate Choice. *Current Biology*, 0(0), 3469–3474. <https://doi.org/10.1016/J.CUB.2018.08.051>

734 Whitlock, M. C., & Schluter, D. (2009). *The Analysis of Biological Data*. Greenwood Village,  
735 Colorado: Roberts and Company Publishers.

736

737

### 738 **Data Accessibility Statement**

739 Sequence data have been deposited in the European Nucleotide Archive with the project number  
740 PREJEB32848.

### 741 **Author Contributions**

742 EVC and NJN conceived and designed the study. EVC, NJN, CPD, CAS and ML carried out field  
743 work. EVC generated and analysed the data with the help of SS. EVC wrote the manuscript, and all  
744 co-authors revised the manuscript.

745

746

747

748

749

750 **Figures and tables**

751

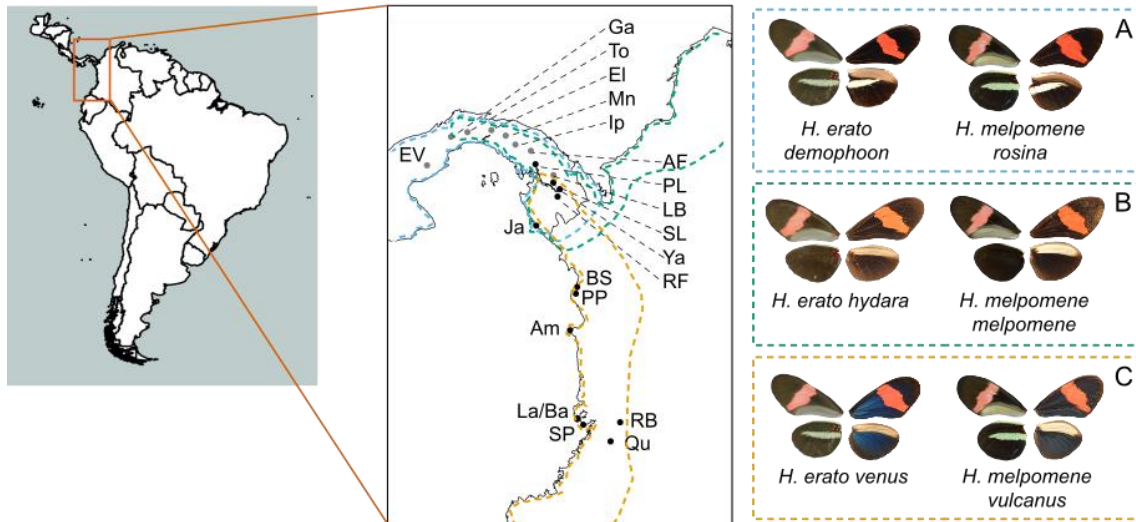

752

753 **Figure 1** – Sampled populations in Colombia and Panama. Sites are labelled with abbreviations  
754 (further information about sites and collections are in Table S1). Photographs show the phenotypes of  
755 mimetic races of *H. erato* and *H. melpomene* from Central America (A), North Colombia (B), and  
756 Western Colombia (C). For each pictured phenotype, the wings on the left-hand side show the ventral  
757 wing pattern, and the wings on the right-hand side show the dorsal wing pattern. Approximate ranges  
758 for the mimetic race pairs are outlined with dashed lines (Rosser, Phillimore, Huertas, Willmott, &  
759 Mallet, 2012). Populations that are included in the phenotypic analysis only are shown in grey,  
760 populations that are included in both the phenotypic and genetic analysis are shown in black.  
761

762

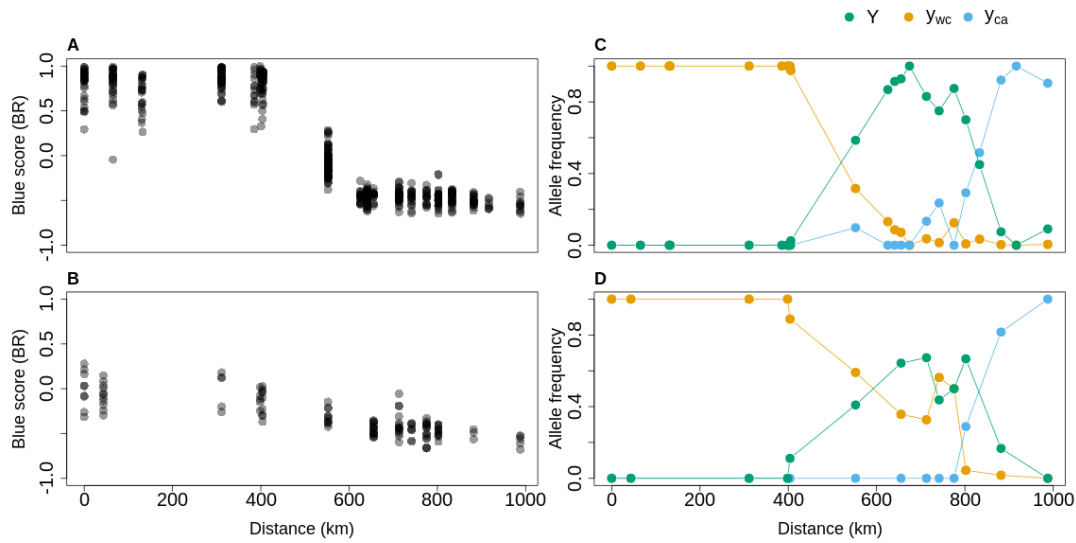

763

764 **Figure 2.** Variation in wing pattern phenotypes across the transect, from 0 km at Queremal, Colombia,  
765 to 987.85 km at El Valle, Panama. Blue score (BR) values of each individual for *H. erato* (A) and *H.*  
766 *melpomene* (B). Frequency of the North Colombian (Y, green), West Colombian (y<sub>wc</sub>, orange) and  
767 Central American (y<sub>ca</sub>, blue) yellow bar allele at each site with 5 or more samples for *H. erato* (C) and  
768 *H. melpomene* (D).

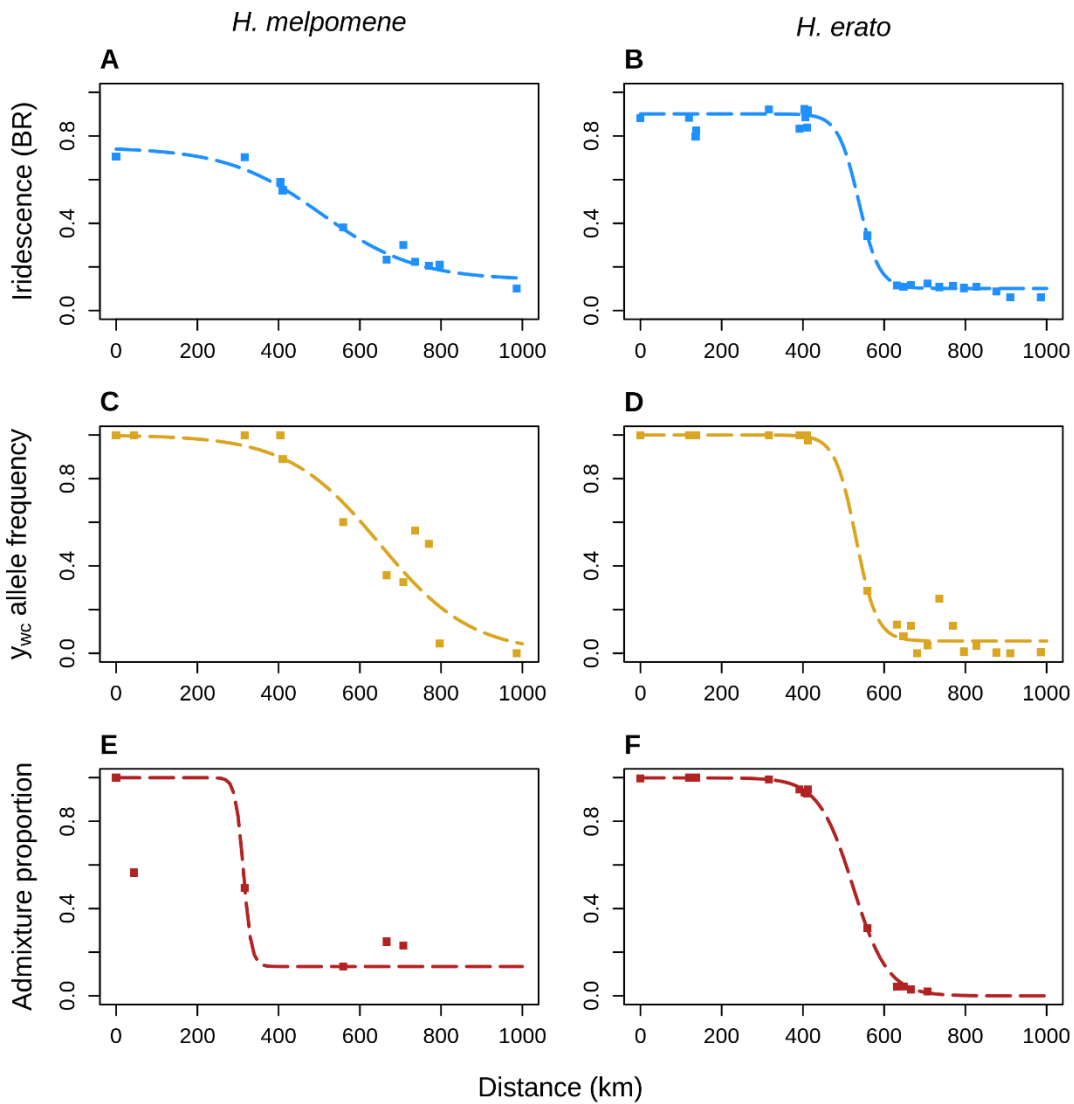

769  
770 **Figure 3** – The best fitting geographic clines (dashed lines) of iridescence (A, B; blue), the West  
771 Colombian yellow bar allele frequency ( $y_{wc}$ ; C, D; yellow), and admixture proportions (E, F; red), across  
772 a transect of sampling sites (points) for *Heliconius melpomene* (A, C, E) and *Heliconius erato* (B, D,  
773 F). The transect begins (at 0 km) in the Queremal locality, in the Cauca Valley region of Colombia.

774

775

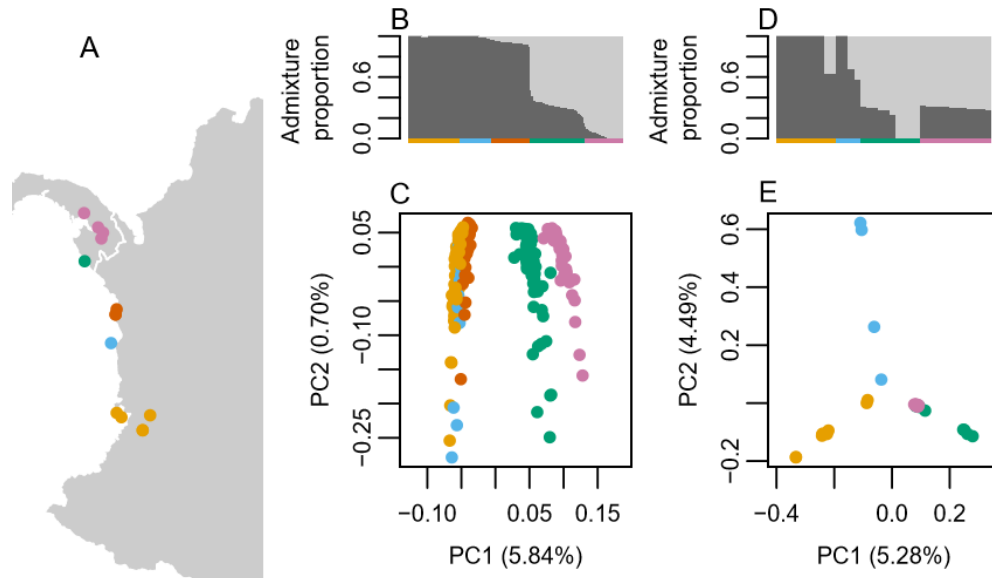

776

777 **Figure 4** – Population structure across the hybrid zones in *H. erato* (**B,C**) and in *H. melpomene* (**D**,  
778 **E**). Sampling locations across the hybrid zone (**A**). Individual admixture proportions estimated using  
779 NGSadmix, with  $k = 2$  (**B, D**). Each horizontal bar represents an individual, bar colour represents the  
780 estimated proportion of ancestry derived from population 1 (dark grey) or population 2 (light grey).  
781 Vertical bars indicate the population of origin, colours match those on the map. Principal components  
782 analysis (**C, E**). Colour of points indicate the population of origin, as shown on the map.

783

784

785

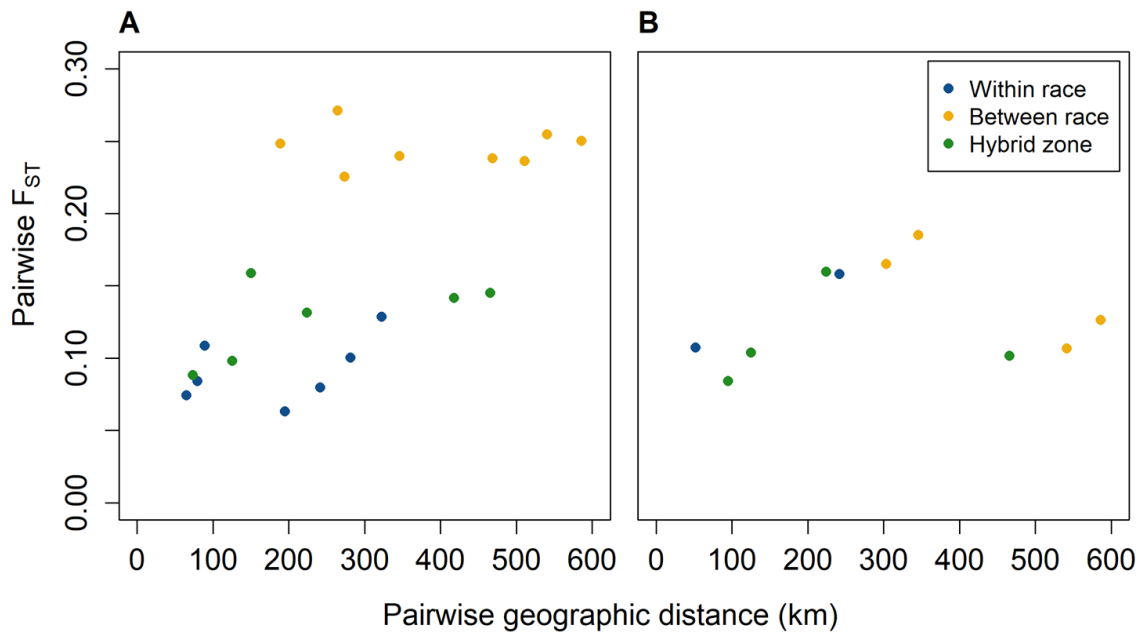

786

787 **Figure 5** – Relationship between geographic distance and genetic differentiation (genome-wide  
788 average  $F_{ST}$ ) between sampling sites in *H. erato* (A) and *H. melpomene* (B). Pairwise comparisons are  
789 colour-coded to indicate comparisons between populations of the same colour pattern race (blue),  
790 between populations of different colour pattern races (yellow), and comparisons where one population  
791 is from the hybrid zone centre (green).

792

793

794

795

796

797



798 **Table 1** – Cline parameter estimates for variation in iridescence,  $y_{wc}$  allele frequency, and admixture proportion across transects for *H. erato* and *H.*  
799 *melpomene*, which begin at the Queremal locality. ML estimates for sigmoid models (Sig), symmetrical stepped models (Sstep), and asymmetrical stepped  
800 models (Astep) were estimated for each trait. If a model is a significantly better fit as determined by a likelihood ratio test (details in Table S6) it is denoted  
801 with \*. Parameters are log-likelihood (LnL) cline centre ( $c$ ), width ( $w$ ), barrier strength for either side of stepped models ( $B_0/w$ ,  $B_1/w$ ), the rate of exponential  
802 decay for either tail ( $\theta_0$ ,  $\theta_1$ ).  
803

| Species                 | Trait       | Model  | LnL                       | Centre (km)               | Width (km)                      | pmin                      | pmax                   | $B_0/w$                    | $\theta_0$               | $B_1/w$                     | $\theta_1$            |
|-------------------------|-------------|--------|---------------------------|---------------------------|---------------------------------|---------------------------|------------------------|----------------------------|--------------------------|-----------------------------|-----------------------|
| <i>Heliconius erato</i> | Iridescence | Sig    | -38.62                    | 537.38<br>(539.92-34.97)  | 101.66<br>(89.66-113.50)        | 0.101<br>(0.096-0.106)    | 0.901<br>(0.889-0.914) | --                         | --                       | --                          | --                    |
|                         |             | Sstep  | -34.12                    | 549.48<br>(508.87-562.98) | 46.11<br>(38.78-74.86)          | 0.084<br>(0.020-0.092)    | 0.917<br>(0.888-0.913) | 63.63<br>(37.24-80.76)     | 0.012<br>(0.0003-0.9998) | --                          | --                    |
|                         |             | Astep* | -27.34                    | 546.38<br>(547.28-550.91) | 78.62<br>(69.46-90.07)          | 0.089<br>(0.021-0.0903)   | 0.90<br>(0.089-0.92)   | 40.63<br>(38.69-56.57)     | 0.005<br>(0.002-0.006)   | 9.56E+09<br>(2E+06 – 1E+10) | 0.73<br>(0.001-0.999) |
|                         | $y_{wc}$    | Sig    | -9.29                     | 530.53<br>(515.48-543.70) | 102.87<br>(70.90-145.19)        | 0.056<br>(0.013-0.088)    | 1.000<br>(0.989-1.00)  | --                         | --                       | --                          | --                    |
|                         |             | Sstep  | -9.83                     | 530.53<br>(510.32-543.20) | 102.81<br>(66.99-167.62)        | 0.056<br>(0.011-0.087)    | 0.999<br>(0.989-1.000) | 7.44E+09<br>(195247-1E+10) | 0.35<br>(0.00-0.99)      | --                          | --                    |
|                         |             | Astep  | -6.59                     | 536.09<br>(523.98-547.17) | 98.19<br>(70.48-145.52)         | 1.00E-04<br>(0.000-0.087) | 1.00<br>(0.989-1.000)  | 8.41<br>(4.17-13.34)       | 0.075<br>(0.052-0.144)   | 6.86E+09<br>(3886-1E+10)    | 0.51<br>(0.000-0.991) |
| Admixture proportion    | Sig         | -25.83 | 523.60<br>(521.26-525.76) | 171.36<br>(167.33-175.56) | 0.000017<br>(0.000015-0.010190) | 0.9995<br>(0.996-0.9998)  | --                     | --                         | --                       | --                          |                       |

|                             |                       |        |        |                               |                                |                                   |                            |                                        |                            |                                         |                            |
|-----------------------------|-----------------------|--------|--------|-------------------------------|--------------------------------|-----------------------------------|----------------------------|----------------------------------------|----------------------------|-----------------------------------------|----------------------------|
|                             |                       | Sstep  | -20.53 | 524.28<br>(520.34-<br>527.59) | 165.84<br>(163.23-<br>169.74)  | 0.000012<br>(0.00001-<br>0.00078) | 0.99<br>(0.996-<br>1.000)  | 1.01<br>(0.83-1.54)                    | 0.98<br>(0.932-<br>0.999)  | --                                      | --                         |
|                             |                       | Astep* | -13.63 | 536.79<br>(522.65-<br>537.43) | 101.30<br>(97.54-<br>110.43)   | 0.021<br>(0.018-<br>0.023)        | 0.99<br>(0.9997-<br>1.000) | 4144656896<br>(6775875-<br>778645878)  | 0.11<br>(0.003-<br>0.999)  | 1.88<br>(0.994-<br>37.975)              | 0.37<br>(0.00-<br>0.873)   |
| <i>Heliconius melpomene</i> | Iridescence           | Sig    | -5.82  | 504.27<br>(474.68-<br>532.89) | 466.31<br>(380.85-<br>567.89)  | 0.14<br>(0.12-<br>0.17)           | 0.75<br>(0.70-<br>0.79)    | --                                     | --                         | --                                      | --                         |
|                             |                       | Sstep  | -3.62  | 553.87<br>(468.98-<br>557.76) | 0.0001<br>(0.00001-<br>0.0118) | 0.0001<br>(0.00001-<br>0.0118)    | 0.82<br>(0.79-<br>0.83)    | 2.10<br>(0.17-<br>12.34)               | 0.021<br>(0.001-<br>0.046) | --                                      | --                         |
|                             |                       | Astep  | -3.40  | 572.18<br>(542.77-<br>584.88) | 454.48<br>(398.87-<br>528.72)  | 0.0001<br>(0.00001-<br>0.0087)    | 0.72<br>(0.70-<br>0.73)    | 1.72<br>(1.23-<br>17.35)               | 0.17<br>(0.000-<br>0.65)   | 136571824<br>(943923-<br>232068365)     | 0.89<br>(0.67-<br>0.999)   |
|                             | <i>y<sub>wc</sub></i> | Sig    | -6.70  | 649.14<br>(597.78-<br>666.74) | 451.92<br>(378.88-<br>513.53)  | 0.0001<br>(0.0001-<br>0.14)       | 1.000<br>(0.999-<br>1.000) | --                                     | --                         | --                                      | --                         |
|                             |                       | Sstep  | -6.70  | 649.17<br>(587.88-<br>668.80) | 451.78<br>(382.81-<br>498.02)  | 0.0001<br>(0.0001-<br>0.14)       | 1.000<br>(0.999-<br>1.000) | 7857362432<br>(4730095-<br>9998937088) | 0.78<br>(0.29-<br>0.998)   | --                                      | --                         |
|                             |                       | Astep  | -6.05  | 511.27<br>(505.82-<br>527.64) | 156.12<br>(135.76-<br>190.54)  | 0.0001<br>(0.0001-<br>0.14)       | 1.00<br>(0.999-<br>1.000)  | 0.70<br>(0.12-<br>0.999)               | 0.078<br>(0.001-<br>0.64)  | 2958797824<br>(4729519 -<br>8986493729) | 0.999<br>(0.000-<br>0.999) |
|                             | Admixture proportion  | Sig    | -0.062 | 313.45<br>(126.86-<br>363.68) | 39.30<br>(0.43-<br>123.81)     | 0.13<br>(0.0001-<br>0.17)         | 1.000<br>(0.900-<br>1.000) | --                                     | --                         | --                                      | --                         |

|       |        |                               |                             |                           |                            |                                        |                          |                                       |                          |
|-------|--------|-------------------------------|-----------------------------|---------------------------|----------------------------|----------------------------------------|--------------------------|---------------------------------------|--------------------------|
| Sstep | -0.062 | 306.36<br>(150.64-<br>313.85) | 122.47<br>(0.37-<br>152.64) | 0.13<br>(0.0001-<br>0.16) | 1.000<br>(0.900-<br>1.000) | 7427586048<br>(1567365-<br>9867457635) | 0.32<br>(0.28-<br>0.999) | --                                    | --                       |
| Astep | -0.062 | 311.74<br>(147.74-<br>343.76) | 59.34<br>(0.52-<br>76.78)   | 0.13<br>(0.0001-<br>0.16) | 1.000<br>(0.900-<br>1.000) | 1764016384<br>(863863-<br>8223565965)  | 0.79<br>(0.67-<br>0.999) | 8084597760<br>(878456-<br>9864222189) | 0.51<br>(0.000-<br>0.97) |

804  
805

806

807 **Table 2** – Likelihood ratio tests for coincidence (*c*) and concordance (*w*) of iridescence, yellow bar,  
 808 and admixture proportion clines.  $\Delta$ ML is the test statistic, d.f. is degrees of freedom. The combination  
 809 of clines being compared is noted under Trait(s).  
 810

| Trait(s)                                      | <i>c</i>    |      |          | <i>w</i>    |      |          |
|-----------------------------------------------|-------------|------|----------|-------------|------|----------|
|                                               | $\Delta$ ML | d.f. | <i>P</i> | $\Delta$ ML | d.f. | <i>P</i> |
| <b><i>H. erato</i></b>                        |             |      |          |             |      |          |
| iridescence, yellow bar                       | 0.75        | 1    | 0.386    | 0           | 1    | 1.000    |
| iridescence, admixture proportion             | 11.22       | 1    | < 0.001  | 16.85       | 1    | < 0.001  |
| iridescence, yellow bar, admixture proportion | 11.93       | 2    | 0.003    | 20.47       | 2    | < 0.001  |
| <b><i>H. melpomene</i></b>                    |             |      |          |             |      |          |
| iridescence, yellow bar                       | 0.80        | 1    | 0.370    | 0.004       | 1    | 0.950    |
| iridescence, admixture proportion             | 0.22        | 1    | 0.639    | 16.85       | 1    | < 0.001  |
| iridescence, yellow bar, admixture proportion | 1.02        | 2    | 0.599    | 0.01        | 2    | 0.994    |
| <b>Both species</b>                           |             |      |          |             |      |          |
| iridescence                                   | 0.62        | 1    | 0.430    | 6.42        | 1    | 0.011    |
| yellow bar                                    | 0.59        | 1    | 0.443    | 1.70        | 1    | 0.192    |
| admixture proportion                          | 0.22        | 1    | 0.639    | 0           | 1    | 1.000    |
| iridescence, yellow bar                       | 1.88        | 3    | 0.598    | 8.13        | 3    | 0.043    |
| iridescence, yellow bar, admixture proportion | 12.95       | 5    | 0.024    | 25.92       | 5    | < 0.001  |

811  
 812  
 813

814
